# Supplementary material for: Inhibitory Activity of Flavonoids, Chrysoeriol and Luteolin-7-O-Glucopyranoside, on Soluble Epoxide Hydrolase from Capsicum chinense
Source: PubMed Central journal article supplement (PMC7072517; doi:10.3390/biom10020180), 2020-01-24

# **Inhibitory activity of flavonoids, chrysoeriol and luteolin-7-O-glucopyranoside, on soluble epoxide hydrolase**

Jang Hoon Kim and Chang Hyun Jin\*

*Advanced Radiation Technology Institute, Korea Atomic Energy Research Institute, Jeongeup, Jeollabuk-do 56212, Republic of Korea*

\* Corresponding author:

Dr. Chang Hyun Jin

Tel., +82-63-570-3162; Fax, +82-63-570-3159 ; E-mail address: chjin@Kaeri.re.kr

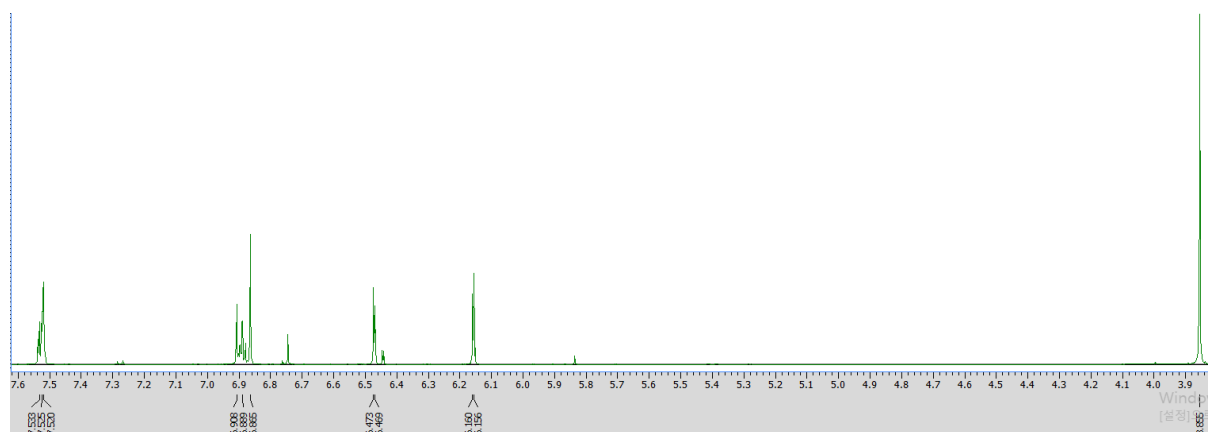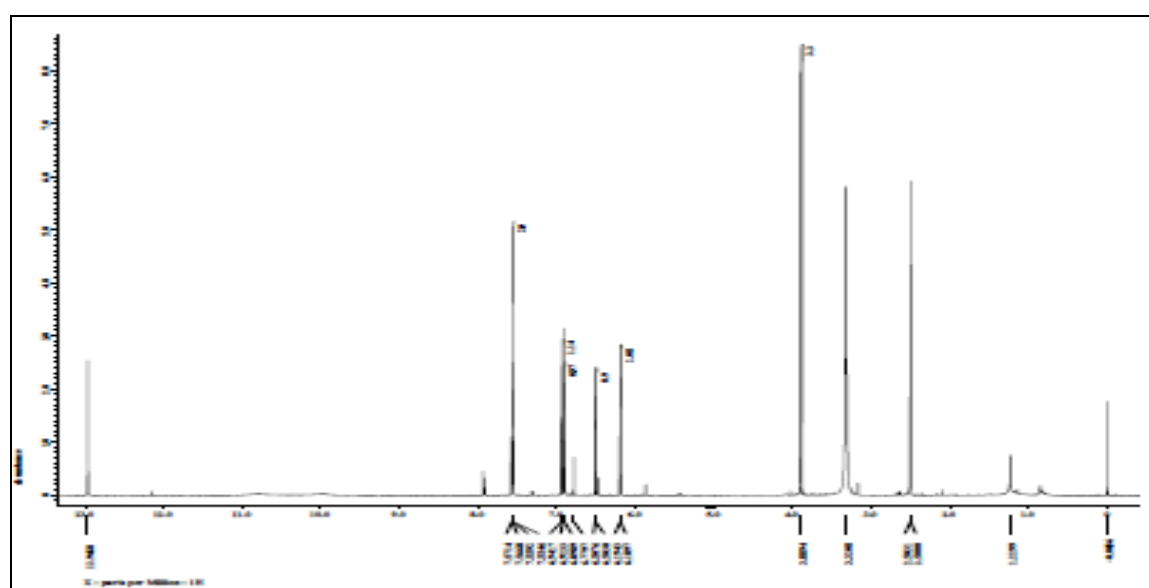

Figure S1.  $^1\text{H-NMR}$  of compound 1.



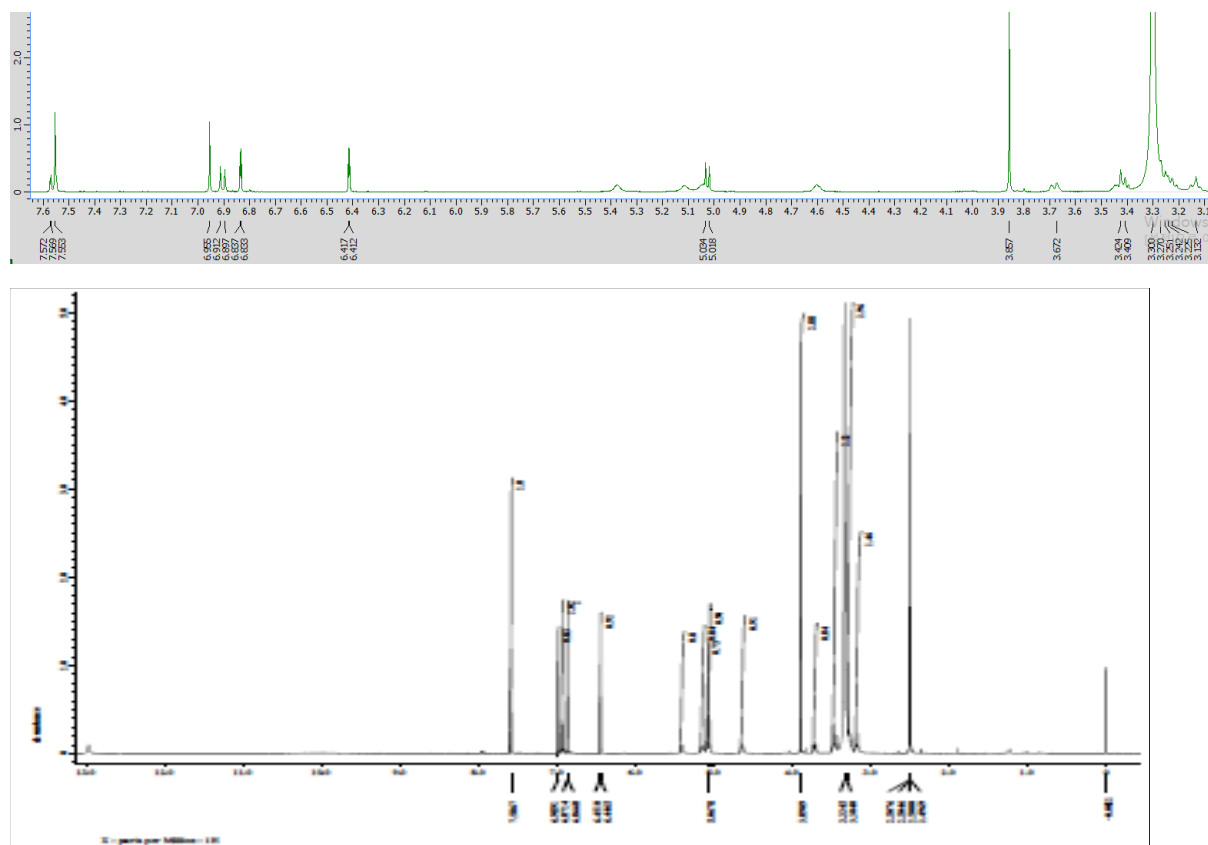

Supplement: biomolecules-10-00180-s001.pdf [file biomolecules-10-00180-s001.pdf]
